# Supplementary material for: Large language models enable high-throughput mining and generation of antimicrobial peptides against clinical superbugs
Source: Research Square preprint supplement (doi:10.21203/rs.3.rs-4690529/v1), 2024-12-04
Supplement: Supplementary file 1 [file 0a84dda420ce31ef3f74dc53.pdf]

**Extended Data Table 2| The quantity of potential AMPs identified among NRSPDs.**

| NRSPDs   | Total       | m_AMPs              | m_AMPs_nontox      |
|----------|-------------|---------------------|--------------------|
| 8-10AAs  | 90,387,710  | 35,542,378 (39.3%)  | 23854081 (26.4%)   |
| 11-15AAs | 114,045,664 | 40,651,897 (35.6%)  | 27,794,568 (24.3%) |
| 16-20AAs | 83,547,524  | 21,765,145 (26.1%)  | 14,686,277 (17.6%) |
| 21-25AAs | 67,076,273  | 13,897,562 (20.7%)  | 9,585,442 (14.3%)  |
| 26-30AAs | 55,135,106  | 9,548,829 (17.3%)   | 6,774,560 (12.3%)  |
| Total    | 410,192,277 | 121,405,811 (29.6%) | 82,694,928 (20.2%) |
