# Supplementary material for: Large language models enable high-throughput mining and generation of antimicrobial peptides against clinical superbugs
Source: Research Square preprint supplement (doi:10.21203/rs.3.rs-4690529/v1), 2024-12-04
Supplement: Supplementary file 1 [file 01729222bc8e8ba865eaea87.xlsx]

## Sheet: Supplementary Table 1
Supplementary Table S1| MICs at high inoculum of g_AMPs and m_AMPs against E. coli ATCC25922 and S. aureus ATCC25923.
Peptide	E. coli	S. aureus	Peptide	E. coli	S. aureus (μg ml-1)
	(μg ml-1)	(μg ml-1)		(μg ml-1)
m_AMP 1	320	80	m_AMP 76	40	10
m_AMP 2	320	160	m_AMP 80	320	640
m_AMP 3	320	320	m_AMP 81	320	80
m_AMP 9	320	160	m_AMP 94	160	640
m_AMP 15	160	640	m_AMP 99	160	320
m_AMP 16	320	320	m_AMP 105	640	1280
m_AMP 20	640	320	m_AMP 125	640	>1280
m_AMP 23	640	>1280	m_AMP 126	640	80
m_AMP 24	320	40	m_AMP 127	320	80
m_AMP 25	160	160	m_AMP 132	640	1280
m_AMP 26	1280	160	m_AMP 139	160	640
m_AMP 27	>1280	1280	m_AMP 140	1280	160
m_AMP 28	320	640	m_AMP 148	640	160
m_AMP 30	640	320	m_AMP 151	80	160
m_AMP 32	1280	>1280	m_AMP 153	160	40
m_AMP 35	1280	1280	g_AMP 5	40	160
m_AMP 36	320	320	g_AMP 13	160	0.625
m_AMP 37	320	320	g_AMP 14	160	0.625
m_AMP 38	640	160	g_AMP 16	160	0.625
m_AMP 39	640	320	g_AMP 17	40	0.625
m_AMP 40	320	1280	g_AMP 20	160	1.25
m_AMP 41	80	20	g_AMP 22	160	0.625
m_AMP 43	1280	1280	g_AMP 25	80	1.25
m_AMP 46	160	40	g_AMP 27	160	80
m_AMP 50	320	640	g_AMP 33	160	320
m_AMP 54	1280	640	g_AMP 35	40	>1280
m_AMP 59	320	640	g_AMP 40	40	0.625
m_AMP 64	320	320	g_AMP 41	10	0.625
m_AMP 66	160	640	g_AMP 42	160	0.625

## Sheet: Supplementary Table 2
Supplementary Table 2| Hemolysis of red blood cells of g_AMPs and m_AMPs.
Hemolysis of red blood cells (g_AMPs)											Hemolysis of red blood cells (m_AMPs)
Peptide	Concentration (μg ml-1)	Hemolysis Ratio_1(%)	Hemolysis Ratio_2(%)	Hemolysis Ratio_3(%)	Hemolysis Ratio_Mean(%)	Hemolysis Ratio_SD					Peptide	Concentration (μg ml-1)	Hemolysis Ratio_1(%)	Hemolysis Ratio_2(%)	Hemolysis Ratio_3(%)	Hemolysis Ratio_Mean(%)	Hemolysis Ratio_SD
g_AMP 5	160	16.7859	14.5912	16.9306	16.1026	1.31089					m_AMP 1	320	0.535756	0.403758	0.232937	0.390817	0.151823
g_AMP 13	160	-1.01294	-0.651178	-0.144706	-0.602942	0.436124					m_AMP 2	320	-0.3727	-0.427052	0.722106	-0.0258819	0.648346
g_AMP 14	160	8.97178	10.853	10.2741	10.033	0.963501					m_AMP 3	320	0.124233	-0.520227	0.854104	0.152703	0.687607
g_AMP 16	160	7.62119	4.65472	3.66589	5.31393	2.0584					m_AMP 9	320	1.12586	-0.333877	0.302819	0.364935	0.73185
g_AMP 17	40	1.9053	0.506472	0.771766	1.06118	0.742966					m_AMP 15	640	-0.605637	-0.597873	0.527991	-0.225173	0.652271
g_AMP 20	160	9.14061	8.53766	6.36707	8.01511	1.45874					m_AMP 16	320	1.15692	1.11033	-0.496933	0.590108	0.941693
g_AMP 22	160	7.74178	9.52649	5.16119	7.47649	2.19471					m_AMP 20	640	-4.41911	-4.49719	-4.30981	-4.4087	0.0941242
g_AMP 25	80	8.51355	52.4801	160.624	73.8725	78.2791					m_AMP 23	640	-4.54403	-4.80949	-4.88757	-4.74703	0.180084
g_AMP 27	160	7.93472	9.4059	12.6618	10.0008	2.41903					m_AMP 24	320	-3.01374	-0.343535	-4.85634	-2.73787	2.26901
g_AMP 33	320	3.56942	3.1353	2.96648	3.22373	0.311047					m_AMP 25	160	-0.256231	-0.318348	-0.333877	-0.302819	0.0410863
g_AMP 35	40	4.79942	4.29295	8.75472	5.94903	2.44296					m_AMP 26	1280	8.82833	7.32976	4.10746	6.75518	2.41231
g_AMP 40	40	19.2942	136.313	149.168	101.592	71.561					m_AMP 27	1280	-3.16989	-5.13741	-4.85634	-4.38788	1.06413
g_AMP 41	10	4.58236	2.17059	2.87001	3.20765	1.24083					m_AMP 28	640	-5.26234	-4.9188	-3.9975	-4.72621	0.654041
g_AMP 42	160	-0.385883	1.61589	4.24471	1.82491	2.32236					m_AMP 30	640	-2.29544	-3.60712	-3.34166	-3.08141	0.693488
											m_AMP 32	1280	-4.96565	-4.95003	-5.09057	-5.00208	0.0770282
											m_AMP 35	1280	-5.01249	-3.65397	-4.88757	-4.51801	0.750886
											m_AMP 36	320	-0.302819	-0.388229	38.3803	12.5631	22.3584
											m_AMP 37	320	-0.489168	-0.256231	-0.217408	-0.320936	0.146981
											m_AMP 38	640	0.628931	0.799752	0.504698	0.64446	0.148139
											m_AMP 39	640	-4.12242	-3.7945	-4.6065	-4.17447	0.408491
											m_AMP 40	1280	2.93501	1.3588	1.4908	1.9282	0.874415
											m_AMP 41	80	2.14302	1.92562	2.08091	2.04985	0.111982
											m_AMP 43	1280	36.9109	41.3247	39.1263	39.1206	2.20688
											m_AMP 46	160	1.60727	1.02492	0.597873	1.07669	0.506685
											m_AMP 50	640	-2.51405	-3.38851	-3.04497	-2.98251	0.44056
											m_AMP 54	1280	-1.3273	-4.7158	-2.0456	-2.69623	1.78549
											m_AMP 59	640	-0.605637	-0.621166	-0.605637	-0.610813	0.00896576
											m_AMP 64	320	-0.551285	-0.0854104	-0.302819	-0.313171	0.23311
											m_AMP 66	640	-0.574579	-0.551285	-0.450346	-0.525403	0.066037
											m_AMP 76	40	-0.419287	-0.108704	-0.326112	-0.284701	0.159379
											m_AMP 80	640	0.3727	0.240702	0.364935	0.326112	0.0740694
											m_AMP 81	320	-4.24735	-4.73142	-4.54403	-4.5076	0.244084
											m_AMP 94	640	0.0931749	0.310583	-0.131998	0.0905867	0.221302
											m_AMP 99	320	-0.0388229	-0.0931749	0.256231	0.0414111	0.188014
											m_AMP 105	1280	0.405996	0.905684	0.499688	0.603789	0.265612
											m_AMP 125	640	-3.31043	-3.37289	-2.99813	-3.22715	0.200784
											m_AMP 126	640	0.590108	6.25049	0.0621166	2.3009	3.43061
											m_AMP 127	320	-0.489168	-0.667754	-0.139762	-0.432228	0.268562
											m_AMP 132	1280	-5.55903	-5.6371	-5.76202	-5.65272	0.102396
											m_AMP 139	640	0.302819	-0.232937	-0.287289	-0.0724694	0.326143
											m_AMP 140	1280	1.21127	0.613402	-0.155292	0.556461	0.68506
											m_AMP 148	640	-0.496933	-0.590108	-0.512462	-0.533168	0.0499193
											m_AMP 151	160	0.0854104	-0.481404	-0.434816	-0.276937	0.314665
											m_AMP 153	160	0.163056	-0.163056	0.496933	0.165644	0.330002

## Sheet: Supplementary Table 3
Supplementary Table 3| MIC values of top 20 AMPs against E.coli, S.aureus, CRAB (three strains), MRSA (two strains), and C. albicans.
Peptide	E.coli ATCC25922 (μg/ml)	S.aureus ATCC25923 (μg/ml)	CRAB QLH-2022-636 (μg/ml)	CRAB QLH-2022-267 (μg/ml)	CRAB QLH-2022-637 (μg/ml)	MRSA QLH-2022-718 (μg/ml)	MRSA QLH-2022-266 (μg/ml)	Candida albicans ATCC10231 (μg/ml)
g_AMP 13	21.3333	128	32	21.3333	26.6667	128	256	32
g_AMP 14	16	16	21.3333	16	16	16	16	16
g_AMP 16	32	16	42.6667	64	42.6667	32	32	300
g_AMP 17	64	64	42.6667	106.667	32	64	64	8
g_AMP 20	32	32	53.3333	42.6667	53.3333	32	32	8
g_AMP 22	42.6667	16	42.6667	32	53.3333	32	32	13.3333
g_AMP 33	3.33333	64	16	16	8	53.3333	64	16
g_AMP 35	13.3333	16	42.6667	21.3333	53.3333	21.3333	26.6667	16
g_AMP 41	4	8	8	8	8	8	13.3333	8
g_AMP 42	4	32	6.66667	21.3333	8	32	32	8
m_AMP 1	64	32	53.3333	64	64	32	32	32
m_AMP 24	32	256	128	128	128	300	300	128
m_AMP 41	32	128	32	32	32	128	128	64
m_AMP 46	4	32	16	16	9.33333	32	32	26.6667
m_AMP 76	4	32	13.3333	8	4	32	32	42.6667
m_AMP 81	16	64	32	32	64	128	64	42.6667
m_AMP 126	64	300	128	128	256	300	300	128
m_AMP 127	64	256	128	128	128	300	300	300
m_AMP 151	16	128	64	64	64	256	256	128
m_AMP 153	32	170.667	128	64	128	256	256	128

## Sheet: Supplementary Table 4
Supplementary Table 4| Blast results of m_AMP46 and m_AMP76 in NCBI.
Description	Scientific Name	Common Name	Taxid	Max Score	Total Score	Query Cover	E value	Per. ident	Acc. Len	Accession
Dolichyl-phosphate-mannose--protein mannosyltransferase 2 [Clavispora lusitaniae]	Clavispora lusitaniae	NA	36911	38.4	38.4	1	0.077	100	794	KAF7582659.1
hypothetical protein BVG19_g2615 [[Candida] boidinii]	[Candida] boidinii	NA	5477	38.4	38.4	1	0.077	100	792	OUM53341.1
putative dolichyl-phosphate-mannose- mannosyltransferase [Clavispora lusitaniae]	Clavispora lusitaniae	NA	36911	38.4	38.4	1	0.077	100	792	QFZ28259.1
hypothetical protein B5S30_g2552 [[Candida] boidinii]	[Candida] boidinii	NA	5477	38.4	38.4	1	0.077	100	790	OWB67196.1
hypothetical protein B5S28_g826 [[Candida] boidinii]	[Candida] boidinii	NA	5477	38.4	38.4	1	0.077	100	783	OWB54964.1
dolichyl-phosphate-mannose-protein mannosyltransferase [Candida albicans P57072]	Candida albicans P57072	NA	1094990	38.4	38.4	1	0.077	100	769	KGR08811.1
dolichyl-phosphate-mannose-protein mannosyltransferase [Candida albicans SC5314]	Candida albicans SC5314	NA	237561	38.4	38.4	1	0.077	100	769	XP_719907.1
dolichyl-phosphate-mannose-protein mannosyltransferase [Candida albicans P76067]	Candida albicans P76067	NA	1094999	38.4	38.4	1	0.077	100	769	KHC36261.1
dolichyl-phosphate-mannose-protein mannosyltransferase [Candida albicans P34048]	Candida albicans P34048	NA	1094991	38.4	38.4	1	0.077	100	769	KGU26560.1
dolichyl-phosphate-mannose-protein mannosyltransferase [Candida albicans P60002]	Candida albicans P60002	NA	1094986	38.4	38.4	1	0.077	100	769	KHC51432.1
dolichyl-phosphate-mannose-protein mannosyltransferase 2 [Candida albicans WO-1]	Candida albicans WO-1	NA	294748	38.4	38.4	1	0.077	100	769	EEQ44716.1
hypothetical protein L150_03112 [Candida albicans Ca529L]	Candida albicans Ca529L	NA	1325634	38.4	38.4	1	0.077	100	769	RLP64367.1
PMT2 [Candida africana]	Candida africana	NA	241526	38.4	38.4	1	0.077	100	769	KAG8203615.1
dolichyl-phosphate-mannose-protein mannosyltransferase [Candida albicans P78042]	Candida albicans P78042	NA	1095000	38.4	38.4	1	0.077	100	769	KHC77716.1
dolichyl-phosphate-D-mannose:protein O-D-mannosyltransferase, putative [Candida dubliniensis CD36]	Candida dubliniensis CD36	NA	573826	38.4	38.4	1	0.077	100	767	XP_002419585.1
Dolichyl-phosphate-mannose--protein mannosyltransferase 2 [Candida viswanathii]	Candida viswanathii	NA	5486	38.4	38.4	1	0.077	100	764	RCK57338.1
Dolichyl-phosphate-mannose--protein mannosyltransferase 2 [Candida viswanathii]	Candida viswanathii	NA	5486	38.4	38.4	1	0.077	100	764	RCK64521.1
dolichyl-P-mannose-protein mannosyltransferase [Cyberlindnera jadinii NRRL Y-1542]	Cyberlindnera jadinii NRRL Y-1542	NA	983966	38.4	38.4	1	0.077	100	761	XP_020071538.1
unnamed protein product [Ambrosiozyma monospora]	Ambrosiozyma monospora	NA	43982	38.4	38.4	1	0.077	100	760	GMG24116.1
Phospho Mannno Transferase; dolichyl-P-mannose-protein mannosyltransferase [Scheffersomyces stipitis CBS 6054]	Scheffersomyces stipitis CBS 6054	NA	322104	38.4	38.4	1	0.077	100	759	XP_001382657.2
uncharacterized protein CLUG_03498 [Clavispora lusitaniae ATCC 42720]	Clavispora lusitaniae ATCC 42720	NA	306902	38.4	38.4	1	0.077	100	753	XP_002616257.1
unnamed protein product [Ambrosiozyma monospora]	Ambrosiozyma monospora	NA	43982	38.4	38.4	1	0.077	100	720	GME80072.1
glycosyltransferase family 39 protein [Ascoidea rubescens DSM 1968]	Ascoidea rubescens DSM 1968	NA	1344418	38.4	38.4	1	0.077	100	712	XP_020049246.1
hypothetical protein PACTADRAFT_49736 [Pachysolen tannophilus NRRL Y-2460]	Pachysolen tannophilus NRRL Y-2460	NA	669874	38.4	38.4	1	0.077	100	635	ODV96377.1
unnamed protein product [[Candida] boidinii]	[Candida] boidinii	NA	5477	38.4	38.4	1	0.077	100	629	GME89769.1
unnamed protein product [[Candida] boidinii]	[Candida] boidinii	NA	5477	38.4	38.4	1	0.077	100	554	GME98670.1
unnamed protein product [[Candida] boidinii]	[Candida] boidinii	NA	5477	38.4	38.4	1	0.078	100	333	GMF42108.1
Dolichyl-phosphate-mannose--protein mannosyltransferase 2 [Candida maltosa Xu316]	Candida maltosa Xu316	NA	1245528	35.8	35.8	1	0.62	88.89	766	EMG45430.1
glycosyltransferase family 39 protein [[Candida] arabinofermentans NRRL YB-2248]	[Candida] arabinofermentans NRRL YB-2248	NA	983967	35.8	35.8	1	0.62	88.89	761	ODV87752.1
sugar-binding protein [Parageobacillus toebii]	Parageobacillus toebii	NA	153151	35.4	35.4	0.88	0.89	100	337	WP_062678632.1
PMT-domain-containing protein [Hanseniaspora valbyensis NRRL Y-1626]	Hanseniaspora valbyensis NRRL Y-1626	NA	766949	35	35	0.88	1.2	100	782	OBA25716.1
hypothetical protein [Peltigera leucophlebia]	Peltigera leucophlebia	NA	52883	34.6	34.6	1	1.7	88.89	2014	MCJ1342282.1
glycosyltransferase family 39 protein [Stemphylium lycopersici]	Stemphylium lycopersici	NA	183478	34.6	34.6	1	1.7	88.89	1578	KNG46460.1
hypothetical protein [Schaereria dolodes]	Schaereria dolodes	NA	1042397	34.6	34.6	1	1.7	88.89	1539	MCJ1485483.1
ERAD-associated protein [Nakaseomyces glabratus]	Nakaseomyces glabratus	NA	5478	34.6	34.6	1	1.7	88.89	1533	KAJ9571994.1
glycosyltransferase family 39 protein [Lasallia pustulata]	Lasallia pustulata	NA	136370	34.6	34.6	1	1.7	88.89	1358	SLM40728.1
CAZyme family GT39 [Aspergillus niger]	Aspergillus niger	NA	5061	34.6	34.6	1	1.7	88.89	1203	KAI2852563.1
PMT-domain-containing protein [Delitschia confertaspora ATCC 74209]	Delitschia confertaspora ATCC 74209	NA	1513339	34.6	34.6	1	1.7	88.89	1150	KAF2196623.1
glycosyltransferase family 39 protein [Trematosphaeria pertusa]	Trematosphaeria pertusa	NA	390896	34.6	34.6	1	1.7	88.89	1137	XP_033688039.1
PMT-domain-containing protein [Lophium mytilinum]	Lophium mytilinum	NA	390894	34.6	34.6	1	1.7	88.89	1130	KAF2498505.1
Dolichyl-phosphate-mannose-protein mannosyltransferase 4 [Paraphaeosphaeria minitans]	Paraphaeosphaeria minitans	NA	565426	34.6	34.6	1	1.7	88.89	1128	KAF9736255.1
glycosyltransferase family 39 protein [Karstenula rhodostoma CBS 690.94]	Karstenula rhodostoma CBS 690.94	NA	1392251	34.6	34.6	1	1.7	88.89	1128	KAF2442499.1
PMT-domain-containing protein [Stagonospora sp. SRC1lsM3a]	Stagonospora sp. SRC1lsM3a	NA	765868	34.6	34.6	1	1.7	88.89	1127	OAL07102.1
glycosyltransferase family 39 protein [Plenodomus tracheiphilus IPT5]	Plenodomus tracheiphilus IPT5	NA	1408161	34.6	34.6	1	1.7	88.89	1127	KAF2847650.1
glycosyltransferase family 39 protein [Lentithecium fluviatile CBS 122367]	Lentithecium fluviatile CBS 122367	NA	1168545	34.6	34.6	1	1.7	88.89	1124	KAF2682845.1
PMT-domain-containing protein [Mytilinidion resinicola]	Mytilinidion resinicola	NA	574789	34.6	34.6	1	1.7	88.89	1122	XP_033572956.1
glycosyltransferase family 39 protein [Cenococcum geophilum 1.58]	Cenococcum geophilum 1.58	NA	794803	34.6	34.6	1	1.7	88.89	1121	OCK93507.1
glycosyltransferase family 39 protein [Cucurbitaria berberidis CBS 394.84]	Cucurbitaria berberidis CBS 394.84	NA	1168544	34.6	34.6	1	1.7	88.89	1116	XP_040785210.1
Dolichyl-phosphate-mannose-protein mannosyltransferase-domain-containing protein [Ampelomyces quisqualis]	Ampelomyces quisqualis	NA	50730	34.6	34.6	1	1.7	88.89	1115	KAF1911592.1
glycosyltransferase family 39 protein [Didymella exigua CBS 183.55]	Didymella exigua CBS 183.55	NA	1150837	34.6	34.6	1	1.7	88.89	1114	XP_033452314.1
PMT-domain-containing protein [Paraphaeosphaeria sporulosa]	Paraphaeosphaeria sporulosa	NA	1460663	34.6	34.6	1	1.7	88.89	1114	XP_018029404.1
PMT-domain-containing protein [Lindgomyces ingoldianus]	Lindgomyces ingoldianus	NA	673940	34.6	34.6	1	1.7	88.89	1110	XP_033544286.1
PMT-domain-containing protein [Pyrenochaeta sp. DS3sAY3a]	Pyrenochaeta sp. DS3sAY3a	NA	765867	34.6	34.6	1	1.7	88.89	1109	OAL44207.1
glycosyltransferase family 39 protein [Aplosporella prunicola CBS 121167]	Aplosporella prunicola CBS 121167	NA	1176127	34.6	34.6	1	1.7	88.89	1107	XP_033402348.1
Dolichyl-phosphate-mannose-protein mannosyltransferase-domain-containing protein [Lophiotrema nucula]	Lophiotrema nucula	NA	690887	34.6	34.6	1	1.7	88.89	1095	KAF2109546.1
PMT-domain-containing protein [Corynespora cassiicola Philippines]	Corynespora cassiicola Philippines	NA	1448308	34.6	34.6	1	1.7	88.89	1094	PSN60833.1
PMT-domain-containing protein [Westerdykella ornata]	Westerdykella ornata	NA	318751	34.6	34.6	1	1.7	88.89	1090	XP_033649492.1
glycosyltransferase family 39 protein [Glonium stellatum]	Glonium stellatum	NA	574774	34.6	34.6	1	1.7	88.89	1089	OCL11607.1
Dolichyl-phosphate-mannose-protein mannosyltransferase-domain-containing protein [Phaeosphaeria sp. MPI-PUGE-AT-0046c]	Phaeosphaeria sp. MPI-PUGE-AT-0046c	NA	2821754	34.6	34.6	1	1.7	88.89	1089	KAH7379198.1
glycosyltransferase family 39 protein [Periconia macrospinosa]	Periconia macrospinosa	NA	97972	34.6	34.6	1	1.7	88.89	1088	PVH98570.1
Dolichyl-phosphate-mannose-protein mannosyltransferase-domain-containing protein [Alternaria alternata]	Alternaria alternata	NA	5599	34.6	34.6	1	1.7	88.89	1087	KAH6849058.1
PMT-domain-containing protein [Alternaria alternata]	Alternaria alternata	NA	5599	34.6	34.6	1	1.7	88.89	1087	XP_018380407.1
PMT-domain-containing protein [Byssothecium circinans]	Byssothecium circinans	NA	147558	34.6	34.6	1	1.7	88.89	1086	KAF1951834.1
PMT-domain-containing protein [Bimuria novae-zelandiae CBS 107.79]	Bimuria novae-zelandiae CBS 107.79	NA	1447943	34.6	34.6	1	1.7	88.89	1086	KAF1969007.1
hypothetical protein SNOG_16550 [Parastagonospora nodorum SN15]	Parastagonospora nodorum SN15	NA	321614	34.6	34.6	1	1.7	88.89	1084	XP_001806658.1
glycosyltransferase family 39 protein [Saccharata proteae CBS 121410]	Saccharata proteae CBS 121410	NA	1314787	34.6	34.6	1	1.7	88.89	1084	KAF2085574.1
Dolichyl-phosphate-mannose-protein mannosyltransferase-domain-containing protein [Paraphoma chrysanthemicola]	Paraphoma chrysanthemicola	NA	798071	34.6	34.6	1	1.7	88.89	1083	KAH7076742.1
Dolichyl-phosphate-mannose-protein mannosyltransferase-domain-containing protein [Paraphoma chrysanthemicola]	Paraphoma chrysanthemicola	NA	798071	34.6	34.6	1	1.7	88.89	1083	KAH7086930.1
PMT-domain-containing protein [Clathrospora elynae]	Clathrospora elynae	NA	706981	34.6	34.6	1	1.7	88.89	1083	KAF1941593.1
PMT-domain-containing protein [Setomelanomma holmii]	Setomelanomma holmii	NA	210430	34.6	34.6	1	1.7	88.89	1083	KAF2035732.1
glycosyltransferase family 39 protein [Aaosphaeria arxii CBS 175.79]	Aaosphaeria arxii CBS 175.79	NA	1450172	34.6	34.6	1	1.7	88.89	1082	XP_033381473.1
Dolichyl-phosphate-mannose-protein mannosyltransferase-domain-containing protein [Dendryphion nanum]	Dendryphion nanum	NA	256645	34.6	34.6	1	1.7	88.89	1082	KAH7124094.1
glycosyltransferase family 39 protein [Exserohilum turcica Et28A]	Exserohilum turcica Et28A	NA	671987	34.6	34.6	1	1.7	88.89	1080	XP_008023523.1
PMT-domain-containing protein [Polyplosphaeria fusca]	Polyplosphaeria fusca	NA	682080	34.6	34.6	1	1.7	88.89	1079	KAF2739142.1
PMT-domain-containing protein [Ophiobolus disseminans]	Ophiobolus disseminans	NA	1469910	34.6	34.6	1	1.7	88.89	1075	KAF2831538.1
PMT-domain-containing protein [Massarina eburnea CBS 473.64]	Massarina eburnea CBS 473.64	NA	1395130	34.6	34.6	1	1.7	88.89	1071	KAF2635303.1
glycosyltransferase family 39 protein [Alternaria burnsii]	Alternaria burnsii	NA	1187904	34.6	34.6	1	1.7	88.89	1071	XP_038785480.1
glycosyltransferase family 39 protein [Macroventuria anomochaeta]	Macroventuria anomochaeta	NA	301207	34.6	34.6	1	1.7	88.89	1071	XP_033561065.1
Dolichyl-phosphate-mannose-protein mannosyltransferase-domain-containing protein [Phaeosphaeriaceae sp. PMI808]	Phaeosphaeriaceae sp. PMI808	NA	1770614	34.6	34.6	1	1.7	88.89	1064	KAH8732906.1
Dolichyl-phosphate-mannose-protein mannosyltransferase-domain-containing protein [Pyrenochaeta sp. MPI-SDFR-AT-0127]	Pyrenochaeta sp. MPI-SDFR-AT-0127	NA	2829485	34.6	34.6	1	1.7	88.89	1058	KAH7372354.1
PMT-domain-containing protein [Lizonia empirigonia]	Lizonia empirigonia	NA	1496277	34.6	34.6	1	1.7	88.89	1042	KAF1360451.1
putative dolichyl-phosphate-mannose-protein mannosyltransferase [Phaeomoniella chlamydospora]	Phaeomoniella chlamydospora	NA	158046	34.6	34.6	1	1.7	88.89	1028	KKY18106.1
protein O-mannosyl-transferase 1 [Aureobasidium melanogenum]	Aureobasidium melanogenum	NA	46634	34.6	34.6	1	1.7	88.89	1010	KAG9796074.1
MIR protein [Coleophoma crateriformis]	Coleophoma crateriformis	NA	565419	34.6	34.6	1	1.7	88.89	991	RDW78495.1
dolichyl-phosphate-mannose--protein mannosyltransferase 4 [Quercus suber]	Quercus suber	NA	58331	34.6	34.6	1	1.7	88.89	918	POF12846.1
unnamed protein product [Penicillium nalgiovense]	Penicillium nalgiovense	NA	60175	34.6	34.6	1	1.7	88.89	882	CAG8242279.1
unnamed protein product [Penicillium nalgiovense]	Penicillium nalgiovense	NA	60175	34.6	34.6	1	1.7	88.89	861	CAG7969037.1
unnamed protein product [Penicillium nalgiovense]	Penicillium nalgiovense	NA	60175	34.6	34.6	1	1.7	88.89	860	CAG8282379.1
unnamed protein product [Penicillium nalgiovense]	Penicillium nalgiovense	NA	60175	34.6	34.6	1	1.7	88.89	860	CAG8115515.1
unnamed protein product [Penicillium nalgiovense]	Penicillium nalgiovense	NA	60175	34.6	34.6	1	1.7	88.89	860	CAG8095664.1
unnamed protein product [Penicillium nalgiovense]	Penicillium nalgiovense	NA	60175	34.6	34.6	1	1.7	88.89	857	CAG8089700.1
unnamed protein product [Penicillium nalgiovense]	Penicillium nalgiovense	NA	60175	34.6	34.6	1	1.7	88.89	856	CAG8929381.1
unnamed protein product [Penicillium nalgiovense]	Penicillium nalgiovense	NA	60175	34.6	34.6	1	1.7	88.89	853	CAG8070393.1
CAZyme family GT39 [Aspergillus niger]	Aspergillus niger	NA	5061	34.6	34.6	1	1.7	88.89	844	KAI2813576.1
CAZyme family GT39 [Aspergillus niger]	Aspergillus niger	NA	5061	34.6	34.6	1	1.7	88.89	844	KAI3004890.1
Dolichyl-phosphate-mannose-protein mannosyltransferase [Rasamsonia emersonii CBS 393.64]	Rasamsonia emersonii CBS 393.64	NA	1408163	34.6	34.6	1	1.7	88.89	842	XP_013327334.1
hypothetical protein L6R37_004315 [Teloschistes peruensis]	Teloschistes peruensis	NA	2903223	34.6	34.6	1	1.7	88.89	841	KAI4102602.1
unnamed protein product [Penicillium nalgiovense]	Penicillium nalgiovense	NA	60175	34.6	34.6	1	1.7	88.89	835	CAG8039121.1
unnamed protein product [Penicillium nalgiovense]	Penicillium nalgiovense	NA	60175	34.6	34.6	1	1.7	88.89	827	CAG8220982.1
hypothetical protein DFL_007180 [Arthrobotrys flagrans]	Arthrobotrys flagrans	NA	97331	34.6	34.6	1	1.7	88.89	821	RVD82766.1
