# Supplementary material for: Large language models enable high-throughput mining and generation of antimicrobial peptides against clinical superbugs
Source: Research Square preprint supplement (doi:10.21203/rs.3.rs-4690529/v1), 2024-12-04
Supplement: Supplementary file 3 [file baad78aa0e6f562a2a8c0de8.pdf]

**Extended Data Table 3| The quantity of potential AMPs identified among GNRSPDs.**

| GNRSPDs  | Total | g_AMPs        | g_AMPs_nontox |
|----------|-------|---------------|---------------|
| Prefix-A | 771   | 449 (58.2%)   | 369 (47.9%)   |
| Prefix-F | 791   | 602 (76.1%)   | 531 (67.1%)   |
| Prefix-G | 790   | 675 (85.4%)   | 443 (56.1%)   |
| Prefix-I | 779   | 568 (72.9%)   | 526 (67.5%)   |
| Prefix-K | 787   | 678 (86.1%)   | 528 (67.1%)   |
| Prefix-L | 762   | 575 (75.5%)   | 514 (67.5%)   |
| Prefix-R | 760   | 631 (83.0%)   | 529 (69.6%)   |
| Prefix-S | 792   | 658 (83.1%)   | 367 (46.3%)   |
| Prefix-V | 790   | 457 (57.8%)   | 401 (50.8%)   |
| Prefix-W | 776   | 645 (83.1%)   | 528 (68.0%)   |
| Total    | 7,798 | 5,938 (76.1%) | 4,736 (60.7%) |
