# Supplementary figures and images for: Large language models enable high-throughput mining and generation of antimicrobial peptides against clinical superbugs
Source: Research Square preprint supplement (doi:10.21203/rs.3.rs-4690529/v1), 2024-12-04

**a**

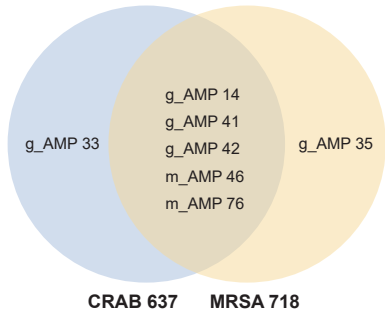

**b**

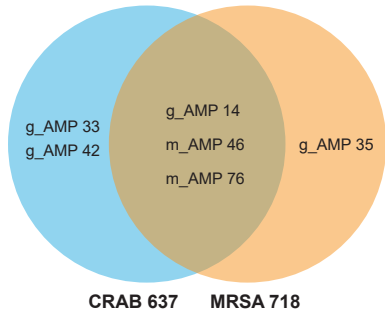

Supplement: Supplementary file 2 [file 8b34cd532bdc54bd831fd09c.pdf]

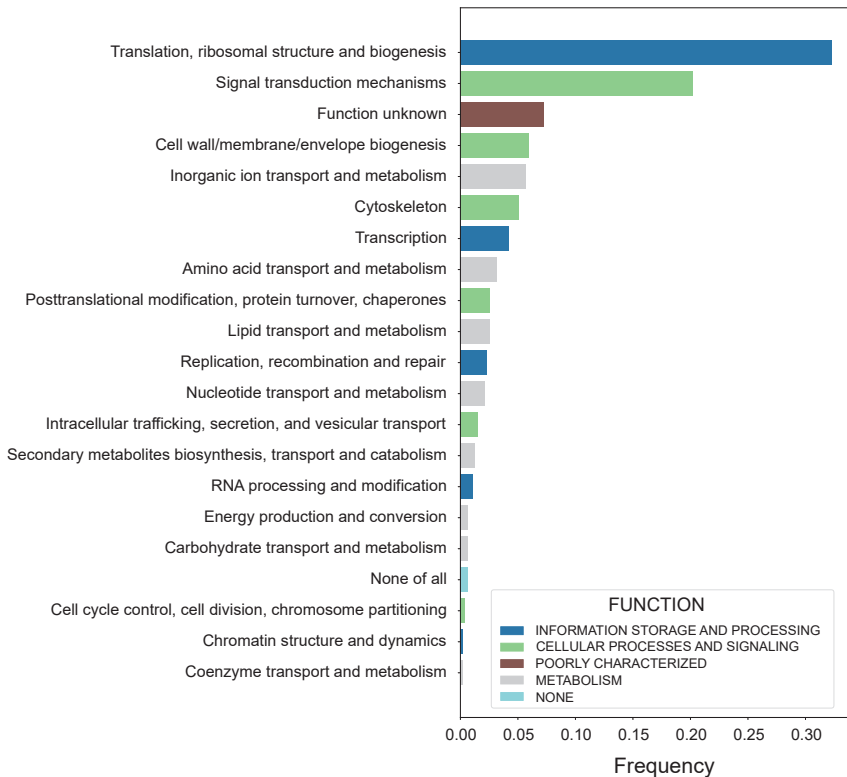

Supplement: Supplementary file 4 [file c95e5a30328c9d3bf7eac51f.pdf]
